# Supplementary material for: Pesticide exposure affects reproductive capacity of common toads (Bufo bufo) in a viticultural landscape
Source: PubMed Central journal article supplement (PMC7902574; doi:10.1007/s10646-020-02335-9), 2021-01-20
Supplement: 10646_2020_2335_MOESM1_ESM.pdf [file 10646_2020_2335_MOESM1_ESM.pdf]

## Supplementary material Table S1

Pesticide exposure affects reproductive capacity of common toads (*Bufo bufo*) in a viticultural landscape

Elena Adams<sup>1\*</sup>, Christoph Leeb<sup>1</sup>, Carsten A. Brühl<sup>1</sup>

<sup>1</sup>iES Landau, Institute for Environmental Sciences, University of Koblenz-Landau, Fortstraße 7, 76829 Landau, Germany

\*Corresponding author: adams@uni-landau.de

**Table S1.** Investigated target pesticides of the aquatic residual analysis. In total 47 different fungicides, six insecticides, three herbicides and two acaricides were investigated.

| Fungicides      | Insecticides        | Herbicides          | Acaricides    |
|-----------------|---------------------|---------------------|---------------|
| Amisulbrom      | Chlorpyrifos-methyl | Atrazine            | Spirodiclofen |
| Azoxystrobin    | Dimethoate          | Carfentrazone-ethyl | Tebufenpyrad  |
| Benalaxyl-M     | Indoxacarb          | Simazine            |               |
| Benthiavdicarb  | Methidathion        |                     |               |
| Boscalid        | Parathion-ethyl     |                     |               |
| Captan          | Parathion-methyl    |                     |               |
| Cyazofamid      |                     |                     |               |
| Cyflufenamid    |                     |                     |               |
| Cyprodinil      |                     |                     |               |
| Dichlofluanid   |                     |                     |               |
| Difenoconazole  |                     |                     |               |
| Dimethomorph    |                     |                     |               |
| Epoxiconazole   |                     |                     |               |
| Famoxadone      |                     |                     |               |
| Fenarimol       |                     |                     |               |
| Fenhexamid      |                     |                     |               |
| Fenpropimorph   |                     |                     |               |
| Fenpyrazamine   |                     |                     |               |
| Folpet          |                     |                     |               |
| Fludioxonil     |                     |                     |               |
| Fluopicolide    |                     |                     |               |
| Fluopyram       |                     |                     |               |
| Fluquinconazole |                     |                     |               |
| Iprodion        |                     |                     |               |
| Iprovalicarb    |                     |                     |               |
| Kresoxim-methyl |                     |                     |               |
| Metalaxyl M     |                     |                     |               |
| Metrafenone     |                     |                     |               |
| Myclobutanil    |                     |                     |               |
| Penconazole     |                     |                     |               |
| Prochloraz      |                     |                     |               |
| Procymidon      |                     |                     |               |
| Propinconazole  |                     |                     |               |
| Proquinazid     |                     |                     |               |
| Pyraclostrobin  |                     |                     |               |
| Pyrifenox       |                     |                     |               |
| Pyrimethanil    |                     |                     |               |
| Quinoxifen      |                     |                     |               |
| Spiroxamin      |                     |                     |               |
| Tebuconazole    |                     |                     |               |
| Tetraconazole   |                     |                     |               |
| Tolyfluanid     |                     |                     |               |
| Triadimefon     |                     |                     |               |
| Triadimenol     |                     |                     |               |
| Trifloxystrobin |                     |                     |               |
| Vinclozolin     |                     |                     |               |
| Zoxamide        |                     |                     |               |
