# Supplementary material for: Pesticide exposure affects reproductive capacity of common toads (Bufo bufo) in a viticultural landscape
Source: PubMed Central journal article supplement (PMC7902574; doi:10.1007/s10646-020-02335-9), 2021-01-20
Supplement: 10646_2020_2335_MOESM2_ESM.pdf [file 10646_2020_2335_MOESM2_ESM.pdf]

## Supplementary material Table S2

Pesticide exposure affects reproductive capacity of common toads (*Bufo bufo*) in a viticultural landscape

Elena Adams<sup>1\*</sup>, Christoph Leeb<sup>1</sup>, Carsten A. Brühl<sup>1</sup>

<sup>1</sup>iES Landau, Institute for Environmental Sciences, University of Koblenz-Landau, Fortstraße 7, 76829 Landau, Germany

\*Corresponding author: adams@uni-landau.de

**Table S2.** Detected pesticide concentrations in the aquatic residual analysis of each study pond and respective risk assessment parameters. In total five samplings were performed (06.04.2018, 19.04.2018, 03.05.2018, 10.05.2018 - rain event, 24.05.2018). Pond letters indicate increasing pesticide contamination (based on the sum of toxic units).

DC = Detected concentration; NOEC = No observed effect concentration (chronic toxicity) for fish and LC50 = Median lethal concentration causing 50% mortality of fish (acute toxicity) were extracted from the Pesticide Properties Database (Agriculture and Environment Unit of the University of Herfortshire 2013); NOEC-RAC = Regulatory acceptable concentration based on the NOEC values, which are divided by the assessment factor for chronic studies (10); LC50-RAC = Regulatory acceptable concentration based on the LC50 values, which are divided by the assessment factor for acute studies (100). Detected concentrations were divided by calculated RAC values. A result > 1 (highlighted in bold) reveals a possible hazard for aquatic organisms.

| Sampling      | Pesticide    | DC<br>(µg/L) | NOEC<br>(µg/L) | NOEC-RAC<br>(µg/L) | DC/NOEC-RAC | LC50<br>(µg/L) | LC50-RAC<br>(µg/L) | DC/LC50-RAC |
|---------------|--------------|--------------|----------------|--------------------|-------------|----------------|--------------------|-------------|
| <b>Pond A</b> |              |              |                |                    |             |                |                    |             |
| 1-5           | -            | -            | -              | -                  | -           | -              | -                  | -           |
| <b>Pond B</b> |              |              |                |                    |             |                |                    |             |
| 1             | Boscalid     | 0.09         | 125            | 12.5               | 0.0072      | 2700           | 27                 | 0.0033      |
|               | Fludioxonil  | 0.04         | 40             | 4                  | 0.0100      | 230            | 2.3                | 0.0174      |
|               | Dimethoate   | 0.03         | 400            | 40                 | 0.0008      | 30200          | 302                | 0.0001      |
| 2             | Boscalid     | 0.02         | 125            | 12.5               | 0.0016      | 2700           | 27                 | 0.0007      |
|               | Zoxamide     | 0.03         | 4              | 0.4                | 0.0750      | 160            | 1.6                | 0.0188      |
| 3             | Dimethoate   | 0.03         | 400            | 40                 | 0.0008      | 30200          | 302                | 0.0001      |
| 4             | Fludioxonil  | 0.06         | 40             | 4                  | 0.0150      | 230            | 0.23               | 0.26        |
|               | Myclobutanil | 0.14         | 200            | 20                 | 0.0070      | 2000           | 2                  | 0.07        |

|   |             |      |     |      |        |       |      |        |
|---|-------------|------|-----|------|--------|-------|------|--------|
| 5 | Dimethoate  | 0.02 | 400 | 40   | 0.0005 | 30200 | 30.2 | 0.0007 |
|   | Boscalid    | 0.02 | 125 | 12.5 | 0.0016 | 2700  | 27   | 0.0007 |
|   | Fludioxonil | 0.07 | 40  | 4    | 0.0175 | 230   | 2.3  | 0.0304 |
|   | Penconazole | 0.02 | 360 | 36   | 0.0006 | 1130  | 11.3 | 0.0018 |

**Pond C**

|   |                     |      |      |      |        |       |       |        |
|---|---------------------|------|------|------|--------|-------|-------|--------|
| 1 | Azoxystrobin        | 0.04 | 147  | 14.7 | 0.0027 | 470   | 4.7   | 0.0085 |
|   | Difenconazole       | 0.02 | 23   | 2.3  | 0.0087 | 1100  | 11    | 0.0018 |
|   | Fludioxonil         | 0.07 | 40   | 4    | 0.0175 | 230   | 2.3   | 0.0304 |
|   | Iprovalicarb        | 0.28 | 9890 | 989  | 0.0003 | 22700 | 227   | 0.0012 |
|   | Metalaxyl M         | 0.08 | 9100 | 910  | 0.0001 | 27000 | 270   | 0.0003 |
|   | Myclobutanil        | 0.03 | 200  | 20   | 0.0015 | 2000  | 20    | 0.0015 |
| 2 | Dimethoate          | 0.05 | 400  | 40   | 0.0013 | 30200 | 302   | 0.0002 |
|   | Azoxystrobin        | 0.03 | 147  | 14.7 | 0.0020 | 470   | 4.7   | 0.0064 |
|   | Fluopyram           | 0.02 | 135  | 13.5 | 0.0015 | 42900 | 429   | 0.0000 |
| 3 | Zoxamide            | 0.12 | 4    | 0.4  | 0.3000 | 160   | 1.6   | 0.0750 |
|   | Folpet              | 0.33 | 8.1  | 0.81 | 0.4074 | 680   | 6.8   | 0.0485 |
| 4 | Iprovalicarb        | 0.09 | 9890 | 989  | 0.0001 | 22700 | 227   | 0.0004 |
|   | Azoxystrobin        | 0.02 | 147  | 14.7 | 0.0014 | 470   | 4.7   | 0.0043 |
| 5 | Fludioxonil         | 0.05 | 40   | 4    | 0.0125 | 230   | 2.3   | 0.0217 |
|   | Iprovalicarb        | 0.11 | 9890 | 989  | 0.0001 | 22700 | 227   | 0.0005 |
|   | Myclobutanil        | 0.04 | 200  | 20   | 0.0020 | 2000  | 20    | 0.0020 |
|   | Pyrimethanil        | 0.02 | 1600 | 160  | 0.0001 | 10560 | 105.6 | 0.0002 |
|   | Dimethoate          | 0.03 | 400  | 40   | 0.0008 | 30200 | 302   | 0.0001 |
|   | Cyflufenamid        | 0.02 | 24   | 2.4  | 0.0083 | 1040  | 10.4  | 0.0019 |
|   | Folpet              | 0.22 | 8.1  | 0.81 | 0.2716 | 680   | 6.8   | 0.0324 |
|   | Fludioxonil         | 0.07 | 40   | 4    | 0.0175 | 230   | 2.3   | 0.0304 |
|   | Iprovalicarb        | 0.11 | 9890 | 989  | 0.0001 | 22700 | 227   | 0.0005 |
|   | Metrafenone         | 0.10 | 228  | 22.8 | 0.0044 | 820   | 8.2   | 0.0122 |
| 5 | Myclobutanil        | 0.10 | 200  | 20   | 0.0050 | 2000  | 20    | 0.0050 |
|   | Tebuconazole        | 0.07 | 10   | 1    | 0.0700 | 4400  | 44    | 0.0016 |
|   | Chlorpyrifos-methyl | 0.02 | 5    | 0.5  | 0.0400 | 410   | 4.1   | 0.0049 |

|               |                     |      |      |      |        |       |       |        |
|---------------|---------------------|------|------|------|--------|-------|-------|--------|
|               | Dimethoate          | 0.04 | 400  | 40   | 0.0010 | 30200 | 302   | 0.0001 |
| <b>Pond D</b> |                     |      |      |      |        |       |       |        |
| 1             | Dimethomorph        | 0.06 | 56   | 5.6  | 0.0107 | 6100  | 61    | 0.0010 |
|               | Famoxadone          | 0.06 | 1.4  | 0.14 | 0.4286 | 11    | 0.11  | 0.5455 |
|               | Iprovalicarb        | 0.44 | 9890 | 989  | 0.0004 | 22700 | 227   | 0.0019 |
|               | Metalaxyl M         | 0.08 | 9100 | 910  | 0.0001 | 27000 | 270   | 0.0003 |
|               | Myclobutanil        | 0.22 | 200  | 20   | 0.0110 | 2000  | 20    | 0.0110 |
|               | Dimethoate          | 0.03 | 400  | 40   | 0.0008 | 30200 | 302   | 0.0001 |
| 2             | Boscalid            | 0.04 | 125  | 12.5 | 0.0032 | 2700  | 27    | 0.0015 |
|               | Fluopicolide        | 0.04 | 155  | 15.5 | 0.0026 | 360   | 3.6   | 0.0111 |
|               | Zoxamide            | 0.04 | 4    | 0.4  | 0.1000 | 160   | 1.6   | 0.0250 |
| 3             | Dimethoate          | 0.03 | 400  | 40   | 0.0008 | 30200 | 302   | 0.0001 |
| 4             | Boscalid            | 0.02 | 125  | 12.5 | 0.0016 | 2700  | 27    | 0.0007 |
|               | Cyflufenamid        | 0.02 | 24   | 2.4  | 0.0083 | 1040  | 10.4  | 0.0019 |
|               | Fludioxonil         | 0.19 | 40   | 4    | 0.0475 | 230   | 2.3   | 0.0826 |
|               | Fluopyram           | 0.17 | 135  | 13.5 | 0.0126 | 42900 | 429   | 0.0004 |
|               | Iprovalicarb        | 0.12 | 9890 | 989  | 0.0001 | 22700 | 227   | 0.0005 |
|               | Myclobutanil        | 0.06 | 200  | 20   | 0.0030 | 2000  | 20    | 0.0030 |
|               | Penconazole         | 0.18 | 360  | 36   | 0.0050 | 1130  | 11.3  | 0.0159 |
|               | Pyrimethanil        | 0.04 | 1600 | 160  | 0.0003 | 10560 | 105.6 | 0.0004 |
|               | Tebuconazole        | 0.08 | 10   | 1    | 0.0800 | 4400  | 44    | 0.0018 |
|               | Chlorpyrifos-methyl | 0.02 | 5    | 0.5  | 0.0400 | 410   | 4.1   | 0.0049 |
|               | Dimethoate          | 0.08 | 400  | 40   | 0.0020 | 30200 | 302   | 0.0003 |
| 5             | Famoxadone          | 0.05 | 1.4  | 0.14 | 0.3571 | 11    | 0.11  | 0.4545 |
|               | Fludioxonil         | 0.06 | 40   | 4    | 0.0150 | 230   | 2.3   | 0.0261 |
|               | Iprovalicarb        | 0.11 | 9890 | 989  | 0.0001 | 22700 | 227   | 0.0005 |
|               | Myclobutanil        | 0.03 | 200  | 20   | 0.0015 | 2000  | 20    | 0.0015 |
|               | Dimethoate          | 0.03 | 400  | 40   | 0.0008 | 30200 | 302   | 0.0001 |
| <b>Pond E</b> |                     |      |      |      |        |       |       |        |
| 1             | Azoxystrobin        | 0.07 | 147  | 14.7 | 0.0048 | 470   | 4.7   | 0.0149 |
|               | Boscalid            | 0.27 | 125  | 12.5 | 0.0216 | 2700  | 27    | 0.0100 |

|   |                     |      |      |      |               |       |       |        |
|---|---------------------|------|------|------|---------------|-------|-------|--------|
|   | Fludioxonil         | 0.07 | 40   | 4    | 0.0175        | 230   | 2.3   | 0.0304 |
|   | Fluopicolide        | 0.04 | 155  | 15.5 | 0.0026        | 360   | 3.6   | 0.0111 |
|   | Fluopyram           | 0.21 | 135  | 13.5 | 0.0156        | 42900 | 429   | 0.0005 |
|   | Iprovalicarb        | 0.12 | 9890 | 989  | 0.0001        | 22700 | 227   | 0.0005 |
|   | Metrafenone         | 0.21 | 228  | 22.8 | 0.0092        | 820   | 8.2   | 0.0256 |
|   | Tetraconazol        | 0.02 | 300  | 30   | 0.0007        | 4400  | 44    | 0.0005 |
| 2 | Boscalid            | 0.02 | 125  | 12.5 | 0.0016        | 2700  | 27    | 0.0007 |
|   | Dimethomorph        | 0.1  | 56   | 5.6  | 0.0179        | 6100  | 61    | 0.0016 |
|   | Folpet              | 4.53 | 8.1  | 0.81 | <b>5.5926</b> | 680   | 6.8   | 0.6662 |
|   | Fluopicolide        | 0.04 | 155  | 15.5 | 0.0026        | 360   | 3.6   | 0.0111 |
|   | Fluopyram           | 0.13 | 135  | 13.5 | 0.0096        | 42900 | 429   | 0.0003 |
|   | Iprovalicarb        | 3.05 | 9890 | 989  | 0.0031        | 22700 | 227   | 0.0134 |
|   | Kresoxim-methyl     | 0.22 | 13   | 1.3  | 0.1692        | 190   | 1.9   | 0.1158 |
|   | Metrafenone         | 0.05 | 228  | 22.8 | 0.0022        | 820   | 8.2   | 0.0061 |
|   | Myclobutanil        | 0.73 | 200  | 20   | 0.0365        | 2000  | 20    | 0.0365 |
|   | Penconazole         | 0.03 | 360  | 36   | 0.0008        | 1130  | 11.3  | 0.0027 |
|   | Pyrimethanil        | 0.03 | 1600 | 160  | 0.0002        | 10560 | 105.6 | 0.0003 |
|   | Zoxamide            | 0.14 | 4    | 0.4  | 0.3500        | 160   | 1.6   | 0.0875 |
|   | Dimethoate          | 0.06 | 400  | 40   | 0.0015        | 30200 | 302   | 0.0002 |
| 3 | Folpet              | 0.58 | 8.1  | 0.81 | 0.7160        | 680   | 6.8   | 0.0853 |
|   | Fludioxonil         | 0.07 | 40   | 4    | 0.0175        | 230   | 2.3   | 0.0304 |
|   | Fluopyram           | 0.20 | 135  | 13.5 | 0.0148        | 42900 | 429   | 0.0005 |
|   | Dimethoate          | 0.02 | 400  | 40   | 0.0005        | 30200 | 302   | 0.0001 |
| 4 | Boscalid            | 0.15 | 125  | 12.5 | 0.0120        | 2700  | 27    | 0.0056 |
|   | Folpet              | 0.20 | 8.1  | 0.81 | 0.2469        | 680   | 6.8   | 0.0294 |
|   | Fludioxonil         | 0.22 | 40   | 4    | 0.0550        | 230   | 2.3   | 0.0957 |
|   | Fluopyram           | 0.18 | 135  | 13.5 | 0.0133        | 42900 | 429   | 0.0004 |
|   | Iprovalicarb        | 0.11 | 9890 | 989  | 0.0001        | 22700 | 227   | 0.0005 |
|   | Myclobutanil        | 0.03 | 200  | 20   | 0.0015        | 2000  | 20    | 0.0015 |
|   | Chlorpyrifos-methyl | 0.02 | 5    | 0.5  | 0.0400        | 410   | 4.1   | 0.0049 |
|   | Dimethoate          | 0.03 | 400  | 40   | 0.0008        | 30200 | 302   | 0.0001 |

|   |                     |      |      |      |               |       |      |               |
|---|---------------------|------|------|------|---------------|-------|------|---------------|
| 5 | Boscalid            | 0.26 | 125  | 12.5 | 0.0208        | 2700  | 27   | 0.0096        |
|   | Famoxadone          | 0.15 | 1.4  | 0.14 | <b>1.0714</b> | 11    | 0.11 | <b>1.3636</b> |
|   | Folpet              | 0.73 | 8.1  | 0.81 | 0.9012        | 680   | 6.8  | 0.1074        |
|   | Fludioxonil         | 0.25 | 40   | 4    | 0.0625        | 230   | 2.3  | 0.1087        |
|   | Fluopicolide        | 0.53 | 155  | 15.5 | 0.0342        | 360   | 3.6  | 0.1472        |
|   | Fluopyram           | 0.23 | 135  | 13.5 | 0.0170        | 42900 | 429  | 0.0005        |
|   | Iprovalicarb        | 0.36 | 9890 | 989  | 0.0004        | 22700 | 227  | 0.0016        |
|   | Metalaxyl M         | 0.24 | 9100 | 910  | 0.0003        | 27000 | 270  | 0.0009        |
|   | Metrafenone         | 0.3  | 228  | 22.8 | 0.0132        | 820   | 8.2  | 0.0366        |
|   | Myclobutanil        | 0.24 | 200  | 20   | 0.0120        | 2000  | 20   | 0.0120        |
|   | Tebuconazole        | 0.05 | 10   | 1    | 0.0500        | 4400  | 44   | 0.0011        |
|   | Zoxamide            | 0.02 | 4    | 0.4  | 0.0500        | 160   | 1.6  | 0.0125        |
|   | Chlorpyrifos-methyl | 0.02 | 5    | 0.5  | 0.0400        | 410   | 4.1  | 0.0049        |
