# Supplementary material for: Pesticide exposure affects reproductive capacity of common toads (Bufo bufo) in a viticultural landscape
Source: PubMed Central journal article supplement (PMC7902574; doi:10.1007/s10646-020-02335-9), 2021-01-20
Supplement: 10646_2020_2335_MOESM3_ESM.pdf [file 10646_2020_2335_MOESM3_ESM.pdf]

### Supplementary material Table S3

Pesticide exposure affects reproductive capacity of common toads (*Bufo bufo*) in a viticultural landscape

Elena Adams<sup>1\*</sup>, Christoph Leeb<sup>1</sup>, Carsten A. Brühl<sup>1</sup>

<sup>1</sup>iES Landau, Institute for Environmental Sciences, University of Koblenz-Landau, Fortstraße 7, 76829 Landau, Germany

\*Corresponding author: adams@uni-landau.de

**Table S3.** Results of the Kendall-Theil Sen Siegel regression model to identify whether the pesticide contamination of ponds (sum of toxic units, STU) affects the investigated reproduction endpoints.

|                    | Coefficient | Estimate | df | <i>p</i> |
|--------------------|-------------|----------|----|----------|
| Fecundity          | STU         | 13.52    | 50 | < 0.001  |
| Fertilization rate | STU         | -0.24    | 46 | < 0.001  |
| Offspring survival | STU         | -3.93    | 46 | < 0.001  |
| Offspring fitness  | STU         | -0.04    | 48 | < 0.001  |
