# Supplementary material for: Pesticide exposure affects reproductive capacity of common toads (Bufo bufo) in a viticultural landscape
Source: PubMed Central journal article supplement (PMC7902574; doi:10.1007/s10646-020-02335-9), 2021-01-20
Supplement: 10646_2020_2335_MOESM4_ESM.pdf [file 10646_2020_2335_MOESM4_ESM.pdf]

## Supplementary material Table S4

Pesticide exposure affects reproductive capacity of common toads (*Bufo bufo*) in a viticultural landscape

Elena Adams<sup>1\*</sup>, Christoph Leeb<sup>1</sup>, Carsten A. Brühl<sup>1</sup>

<sup>1</sup>iES Landau, Institute for Environmental Sciences, University of Koblenz-Landau, Fortstraße 7, 76829 Landau, Germany

\*Corresponding author: adams@uni-landau.de

**Table S4.** Determined median, mean and standard deviation for the investigated reproductive endpoints and ponds.

| Endpoint               | Pond | Median | Mean  | Standard deviation |
|------------------------|------|--------|-------|--------------------|
| Fecundity (eggs/g)     | A    | 46     | 49    | 11                 |
|                        | B    | 55     | 54    | 11                 |
|                        | C    | 68     | 70    | 11                 |
|                        | D    | 71     | 69    | 23                 |
|                        | E    | 81     | 74    | 30                 |
| Fertilization rate (%) | A    | 99.2   | 98.9  | 0.9                |
|                        | B    | 97.8   | 98.96 | 3.6                |
|                        | C    | 99.7   | 100.0 | 0.5                |
|                        | D    | 94.5   | 96.1  | 7.1                |
|                        | E    | 92.0   | 94.4  | 8.5                |
| Offspring survival (%) | A    | 97.0   | 98.9  | 4.1                |
|                        | B    | 92.9   | 93.3  | 4.8                |
|                        | C    | 94.7   | 95.0  | 4.2                |
|                        | D    | 88.9   | 92.1  | 8.9                |
|                        | E    | 54.2   | 66.3  | 36.0               |
| Tadpole length (mm)    | A    | 12.5   | 12.4  | 0.5                |
|                        | B    | 11.8   | 11.8  | 0.5                |
|                        | C    | 11.4   | 11.3  | 0.4                |
|                        | D    | 11.8   | 11.7  | 0.8                |
|                        | E    | 11.3   | 11.2  | 0.4                |
